# Supplementary material
Source: publisher site journal article supplement (https://www.dovepress.com/article/263249)
Supplement: Supplementary file 1 [file get_supplementary_file.php]

Supplementary Material A: Multiple choice test given to residents at the conclusion of Phase 1.

Supplementary Material B: Post-curriculum survey given to residents to assess knowledge and current surgical practice patterns.

Supplementary Material: Exhibit A

1. Which of the following statements is TRUE regarding an apodized diffractive multifocal intraocular lens (MFIOL)?
   1. The central diffractive rings occupy 2.6 mm of the optic and the rest of the optic functions as a monofocal IOL
   2. The central diffractive rings are located on the posterior aspect of the optic
   3. In mesopic-scotopic conditions, patients with large pupils may complain of poor near and reading vision
   4. This type of MFIOL will correct for spherical aberration and chromatic aberration in patients thereby allowing for increased quality of vision at all distances
   5. There is a lower risk for both posterior capsular opacification formation and capsular block syndrome
2. With regards to multifocal IOLs, which of the following statements is TRUE?
   1. The Alcon ReStor is a non-apodized MFIOL with the rings on the posterior optic extending throughout the full surface of the optic
   2. Patients with large mesopic pupil sizes will report less glare and haloes after MFIOL surgery
   3. The AMO Tecnis multifocal IOL comes in two add powers: +3.25 and 4.00
   4. The Alcon ReStor yields better low light near (reading) vision in a patient with 6 mm mesopic pupil as compared to the AMO Tecnic MFIOL
   5. On a given diffractive MFIOL, if the step height is 1 wavelength, then all incoming light rays will be split towards the near focal point
3. In regards to a patient who wears hard contact lenses that now needs cataract surgery and is interested in an advanced technology IOL (ATIOL), which of the following statements is TRUE:
   1. The patient should be advised to remove his hard contact lenses for at least two weeks prior to keratometry and topography measurements
   2. A toric intraocular lens is contraindicated in this patient population
   3. A multifocal intraocular lens is contraindicated in this patient population
   4. An error in keratometry measurements will yield an IOL power of error of approximately 2 diopters
4. Which of the following IOL calculation formulas is NOT a multivariable calculation formula?
   1. Hill RBF
   2. Holladay II
   3. Barrett
   4. Olsen
   5. Holladay I
5. Which of the following is TRUE in regards to spherical IOLs?
   1. Spherical IOLs will yield a much lower objective best corrected visual acuity when compared to aspherical IOLs
   2. The amount of spherical aberration induced by a spherical IOL is independent of the dioptric power of the spherical IOL
   3. Spherical IOLs are a poor IOL choice in patients with history of pseudoexfoliation syndrome
   4. Spherical IOLs may confer better near vision to patients when compared to aspherical IOLs
6. Which of the following statements is TRUE regarding visual angles and axes:
   1. Angle kappa is the angle between the optical axis and the visual axis
   2. Angle alpha is the angle between the optical axis and the visual axis
   3. The visual axis is an imaginary line that is perpendicular to the cornea that passes through the midpoint of the pupil
   4. The visual axis is an imaginary line that connects the center of the cornea, center of the crystalline lens and the center of the fovea
7. When performing cataract surgery in a patient with long axial length, which of the following statements is TRUE:
   1. Because the biometry signal is spending more time traveling in the vitreous, the measured axial length is falsely short
   2. If using a third generation (or earlier) IOL calculation formula, there is a risk for hyperopic surprise
   3. Toric intraocular lenses are very stable in the capsular bag in this patient population
   4. Phaco machine settings should be set for high aspiration/flow rate to efficiently remove the cataract
8. All of the following optical aberrations contribute to “aberropia” EXCEPT:
   1. Myopia
   2. Spherical aberration
   3. Trefoil
   4. Coma
   5. Quadrafoil
9. A 72 year old patient presents to your office for a second opinion after undergoing cataract surgery with multifocal IOL in the right eye 2 months ago with another cataract surgeon. She complains of haloes and glare, especially at night time. Uncorrected visual acuity in the office today is 20/20 at distance and J2 at near. Repeat manifest refraction today yields: -0.25+0.25x180 in the right eye. Slit lamp exam reveals a MFIOL fully in the bag. However, when the patient fixates on the light source, the Purkinje image falls on a temporal concentric ring of the IOL optic. The DFE is unremarkable. Exam of the left eye reveals 20/25 vision, MRx: -0.50 + 0.50 x 100 (20/20), 1-2+ NS and unremarkable DFE. Which of the following is a reasonable explanation for why this patient is unhappy with her vision at this time?
   1. The patient has uncorrected refractive error that is contributing to her symptoms in mesopic lighting conditions. Excimer laser ablation based on today’s manifest refraction will likely resolve her complaints
   2. The patient is suffering from anisometropia and should be advised to have cataract surgery in the left eye.
   3. The patient likely has a significant angle kappa that is contributing to her symptoms in mesopic conditions
   4. The patient likely has a significant angle alpha that is contributing to her symptoms in mesopic conditions
10. Which of the following statements about multifocal intraocular lenses (MFIOLs) is TRUE:
    1. MFIOLs can correct higher order aberrations of the cornea
    2. An apodized diffractive MFIOL is an IOL wherein the steps have abrupt, discrete steps from the center to the periphery, allowing for splitting light into distinct focal points
    3. A non-apodized diffractive MFIOL is an IOL that has diffractive steps of uniform height, located on the posterior aspect of the optic, from the center to the periphery
    4. A refractive MFIOL has significant less glare and haloes as compared to a diffractive MFIOL
11. Which of the following presbyopia correcting IOLs is NOT available with a toric option?
    1. Alcon ReStor (+3.00 and +2.50 add)
    2. AMO Tecnis Multifocal (+2.75, +3.25 and +4.00 add)
    3. AMO Symfony
    4. Bausch and Lomb Crystalens
12. Which of the following statements is TRUE about a defocus curve?
    1. It is performed by correcting the patient’s best distance visual acuity for 20/20 and adding more minus lenses (in -0.50D increments) until -4.00D is reached.
    2. During this test, giving a patient an additional -2D would simulate vision at approximately 100 cm
    3. Defocus curves have shown that the higher add powers for MFIOLs will give better intermediate vision and lower add powers for MFIOLs will give better near vision
    4. It is no longer a valid means to assess the function of a MFIOL for range of vision across multiple distances
13. Which of the following statements regarding spherical aberration is TRUE:
    1. Whenever possible, surgeons should attempt to correct as much spherical aberration as possible in order to minimize its negative effects
    2. Spherical aberration does not contribute to night myopia
    3. Spherical aberration occurs because peripheral light rays are focused behind the retina as compared to undeviated central light rays
    4. Spherical aberration of a given cornea is increased after post-myopic LASIK surgery
14. Which of the following statements about non-apodized diffractive MFIOLs are TRUE:
    1. If a patient requires astigmatism correction, toric options of this MFIOL are available to correct up to 4D of keratometric astigmatism
    2. This MFIOL has 18 rings on the posterior aspect of the optic with each ring having a uniform height of 1 wavelength
    3. This MFIOL tends to give the best intermediate vision among all currently available ATIOLs, especially in low light conditions
    4. Patients report poor reading vision in mesopic-scotopic conditions with this MFIOL
15. Which of the following statements regarding extended-depth-of-focus (Symfony) IOLs is TRUE?
    1. EDOF IOLs rely on diffractive optics to split incoming light rays into near, intermediate and distance focal points, thereby giving patients a full range of vision at all distances
    2. EDOF IOLs correct chromatic aberration as well as spherical aberration
    3. EDOF IOLs yield better near vision as compared to MFIOLs
    4. Patients who receive EDOF IOLs will not complain of glare, haloes and starbursts at night
16. Which of the following statements regarding topography is TRUE:
    1. The tangential power map gives the best approximation for central corneal power
    2. The axial power map gives the best approximation for peripheral corneal power and is therefore a useful map to follow over time in patients with suspected corneal ectatic disease
    3. The SimK provides the power and location of the steepest and flattest meridians and therefore has good correlation with refractive cylinder
    4. The surface asymmetry index (SAI) measures the difference in corneal power between any two given points on the cornea 90 degrees apart
    5. The surface regularity index (SRI) would have negative values in cases of irregular astigmatism and corneal ectasias
17. If a patient has undergone previous PRK or LASIK for myopia in the past and now presents for cataract surgery inquiring about options for ATIOLs, which of the following statements is TRUE:
    1. Diffractive MFIOLs and EDOF-IOLs in this patient population have the lowest rate of glare, haloes and starbursts after cataract surgery
    2. Accommodating IOLs would cause less glare, haloes and starbursts in these patients as compared to MFIOLs and EDOF-IOLs
    3. Monovision with monofocal IOLs will cause increased glare, haloes and starbursts after cataract surgery
    4. IOL calculation in this population is made much easier given the improved corneal shape from previous PRK/LASIK
18. Which of the following statements concerning IOL calculation in patients with previous history of LASIK surgery to correct myopia is TRUE?
    1. Optical biometry tends to overestimate axial length because of the corneal changes after LASIK
    2. Optical biometry tends to underestimate axial length because of the corneal changes after LASIK
    3. Corneal topography underestimates true central corneal curvature and power in corneas with previous LASIK surgery
    4. Corneal topography overestimates true central corneal curvature and power in corneas with previous LASIK surgery
19. All of the following are technologies used for aberrometry EXCEPT:
    1. Ray-tracing
    2. Hartmann Shack
    3. Dynamic skiascopy
    4. Topography and tomography
20. Which of the following structures provides the highest refractive power in the eye?
    1. Tear-film / Cornea interface
    2. Air / Tear-film interface
    3. Anterior Cornea / Posterior Cornea interface
    4. Posterior Cornea / Aqueous Interface
    5. Aqueous / Anterior Capsule of Crystalline Lens Interface
21. What effect do limbal relaxing incisions have on the cornea?
    1. Flattening in the meridian of the incision and steepening 90 degrees away
    2. Steepening in the meridian of the incision and flattening 90 degrees away
    3. Flattening in the meridian of the incision and flattening 90 degrees away
    4. Flattening in the meridian of the incision and steepening 180 degrees away
22. Which of the following MFIOL options at the time of cataract surgery OU would be a reasonable choice in an 82 year old woman who is 5 feet tall, doesn’t use the computer and enjoys reading 4-6 hours a day, often in low-light conditions?
    1. Apodized MFIOL with +3.00 add
    2. Non-apodized MFIOL with +2.75 add
    3. Non-apodized MFIOL with +3.25 add
    4. Non-apodized MFIOL with +4.00 add
23. When performing biometry on a patient who is interested in an ATIOL with cataract surgery, you notice that the corneal astigmatism readings have significant variance (3D difference between optical biometry and topography). Which of the following statements is the next BEST course of action:
    1. This patient likely has corneal ectasia and should not be considered for ATIOL surgery
    2. The patient should be brought back on another day for repeat measurements with instructions given for optimizing the ocular surface and tear film
    3. You can safely proceed with ATIOL surgery and rely on intraoperative aberrometry to finalize the ATIOL power at the time of surgery
    4. Choose the higher corneal astigmatism measurements and proceed with ATIOL surgery
24. Which of the following statements is TRUE regarding EDOF-IOLs?
    1. There are multiple add options available for this ATIOL
    2. This ATIOL corrects both spherical aberration and chromatic aberration
    3. EDOF-IOLs rely on positional change of the IOL to allow for an extended depth of vision for distance, near and intermediate vision
    4. EDOF-IOLs provide better near and distance vision as compared to older-generation MFIOLs
    5. EDOF-IOLs have rates of glare and haloes comparable to monofocal IOLs
25. Which of the following examples represents the BEST example of a mix and match strategy with ATIOLs?
    1. Placement of a +4.00D MFIOL in the dominant eye and accommodating ATIOL in the non-dominant eye
    2. Placement of a +2.75D MFIOL in the dominant eye and a +4.00D MFIOL in the non-dominant eye
    3. Placement of a +3.00D MFIOL targeted for plano in the non-dominant eye and a +3.00D MFIOL targeted for -1.00D in the dominant eye
    4. Placement of a monofocal IOL targeted for plano in the dominant eye and a +3.25D MFIOL in the non-dominant eye
26. Which of the following patients represents the best candidate for ATIOL surgery?
    1. A 65-year-old patient with refractive error plano in the dominant eye and -1.75D sphere in the non-dominant eye
    2. A 65-year-old patient with refractive error of -16.00D in both eyes
    3. A 65-year-old patient who desires to see at 20/15 vision across all distances and fervently desires to not use glasses for any visual activities
    4. A 65-year-old patient who is +1.50D sphere in both eyes
    5. A 65-year-old patient with extra money in their flex spending account that wants to use it before the end of the calendar year
27. What term is used to describe a post-operative asymmetrical vaulting configuration that can be seen in an accommodating IOL?
    1. X-syndrome
    2. A-syndrome
    3. Y-syndrome
    4. Z-syndrome
28. Which of the following statements regarding accommodative IOLs (AIOLs) is TRUE:
    1. AIOLs have the highest rate of glare, haloes and starbursts compared to other ATIOLs
    2. The optic size of an AIOL is 5.0mm
    3. Postoperative capsule fibrosis will lead to increased movement of the AIOL, thereby giving the patient an excellent range of vision across all distances
    4. The index of refraction of an AIOL is approximately 1.54
29. Which of the following statements is MOST CORRECT regarding preoperative evaluation of ATIOL surgery:
    1. Ocular surface disease/dry eye can be easily managed in the postoperative period
    2. Ocular surface disease/dry eye must be optimized prior to cataract surgery
    3. Ocular surface disease/dry eye must be optimized prior to biometry measurements
    4. Ocular surface disease/dry eye must be optimized prior to initial cataract surgery evaluation
30. Regarding MFIOLs and EDOF-IOLs, which of the following statements is MOST ACCURATE in regards to the postoperative period
    1. Intermediate and near vision should only be checked monocularly
    2. Patients with intractable glare and haloes should undergo YAG capsulotomy as urgently as possible
    3. Patients with intractable glare and haloes may require an IOL exchange
    4. Patients with intractable glare and haloes would benefit from excimer laser surgery to correct the refractive error
    5. Patients with intractable glare and haloes would benefit from a piggyback IOL

Answer Key

1. C
2. E
3. A
4. E
5. D
6. B
7. B
8. A
9. D
10. C
11. B
12. A
13. D
14. B
15. B
16. C
17. B
18. D
19. D
20. B
21. A
22. D
23. B
24. B
25. B
26. D
27. D
28. B
29. C
30. C

Supplementary Material: Exhibit B

Survey

*Respondents were given the following questions with answers 1 (“Not at all”) to 5 (“A great deal”). These questions were answered by all 12 respondents.*

1. How comfortable (or knowledgeable) do you feel you are about preoperative knowledge of ATIOLs, presurgical clinical exam, workup, and testing prior to using advanced technology IOLs (ATIOLs)?
2. How comfortable (or knowledgeable) do you feel you are about patient selection for ATIOLs and/or making recommendations for an ATIOL?
3. How comfortable (or knowledgeable) do you feel you are about intraoperative steps that are necessary when using ATIOLs (e.g. marking the patient, inserting the IOL, aligning the IOL)?
4. How comfortable (or knowledgeable) do you feel you are about postoperative management (including expectations) of patients who receive ATIOLs?
5. To what degree do you think that currently available ATIOLs will provide spectacle independence for all three zones of vision (distance, intermediate, and near) for patients?

*The following two questions were answered by 8/12 respondents (i.e., those who are performing cataract surgery after residency)*

1. Do you feel that your residency experiences helped to better prepare you for using ATIOLs in your future/current practice?
2. To what degree do you think you will use ATIOLs (or are currently using ATIOLs) in your surgical practice after residency?

*Questions 8 and 9 were also answered by all 12 respondents. Question 8 was given to query residents’ preferences towards the four non-toric ATIOLs used in the study. Answers were based on a 1 (Least Preferred) to 4 (Most Preferred) scale*.

1. Rank the following non-toric ATIOLs based on your personal practice pattern of preference:

- Multifocal IOL: Restor +2.5 (SV25T0) and Restor +3.0 (SN6AD1)
- Multifocal IOL: Tecnis Multifocal +2.75 (ZKBOO), +3.25 (ZLBOO) and +4.00 (ZMBOO)
- Extended Depth of Focus IOL: Symfony (ZXROO)
- Accommodating IOL: Crystalens (AO1UV)

*Question 9 was given to query residents’ preferences towards the three toric ATIOLs used in the study. Answers were based on a 1 (Least Preferred) to 3 (Most Preferred) scale.*

1. Rank the following toric ATIOLs based on your personal practice pattern of preference:

- Toric Multifocal IOL: Restor +2.5 (SV25Tx) and Restor +3.0 (SND1Tx)
- Toric Extended Depth of Focus IOL: Symfony toric (ZXTxx)
- Toric Accommodating IOL: Trulign (BL1UTxxx)

*Open Box for “Is there anything you would recommend to improve the surgical curriculum and experience” (Results)*

- If more attendings could staff cases where residents can use their trial ATIOLs, there would be more continuous exposure to these lenses throughout the whole year.
- Working more on indications for using premium iols
- Increased exposure and availability
- More attendings who focus on expanding the residence experience with premium lenses. Amazing experience!

Earlier exposure to ATIOL in first and second year (didactics)
More practice with crystalens
Using a broad spectrum of IOLs both monofocal and Multifocal
